# Supplementary material
Source: PubMed Central journal article supplement (PMC3161606)
Supplement: 1103247108_pnas.201103247SI.pdf [file 1103247108_pnas.201103247SI.pdf]

# Supporting Information

Wall et al. 10.1073/pnas.1103247108

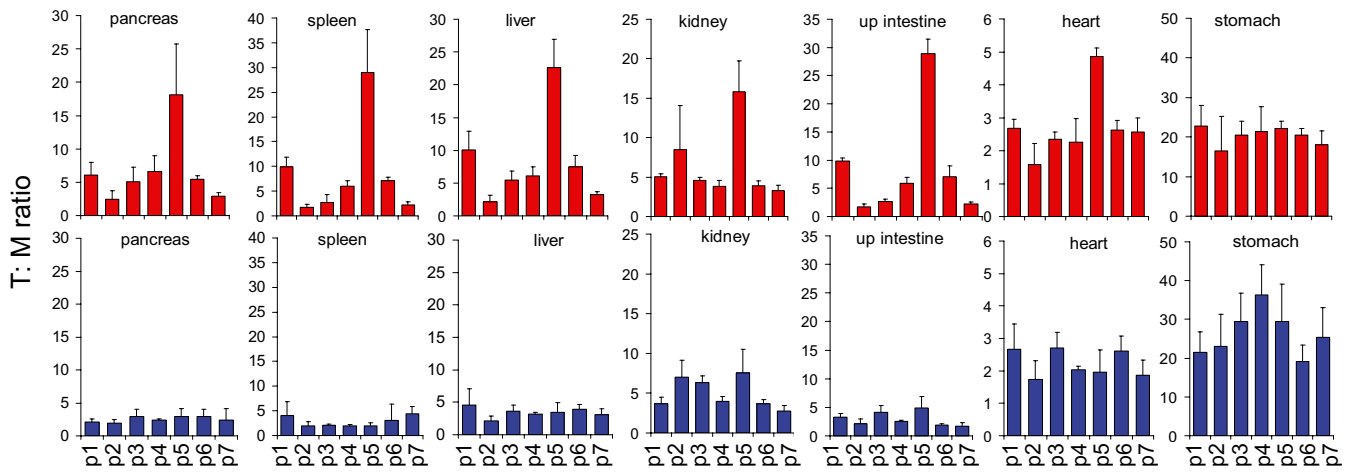

**Fig. S1.** Tissue to muscle ratios for iodine-125 ( $^{125}\text{I}$ )-labeled peptides p1–p7 in reactive amyloidosis (AA) amyloid-bearing mice (red) or WT littermate control animals (blue) at 1 h postinjection (pi) of radiotracer. Tissue to muscle ratios were calculated using the mean percent injected dose (ID) per gram values ( $n = 3$ ) for each tissue relative to the mean percent ID per gram values for muscle.

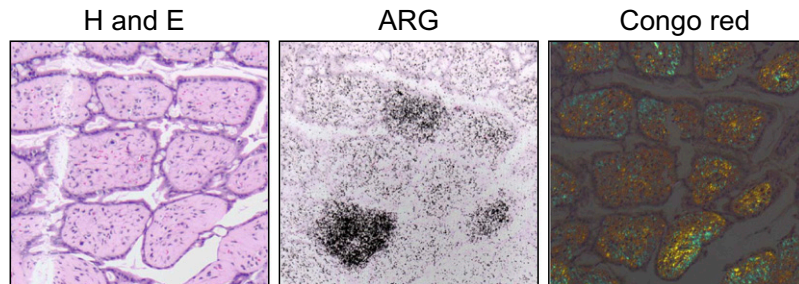

**Fig. S2.** The  $^{125}\text{I}$ -p5 peptide binds apolipoprotein A2c amyloid in vivo in the intestines of transgenic mice. Transgenic mice expressing the mouse apolipoprotein A2c allele were injected with  $\sim 100 \mu\text{Ci}$   $^{125}\text{I}$ -p5 peptide and euthanized 2 h pi. Tissues were harvested at necropsy, formalin-fixed tissue sections were prepared, and microautoradiographs were generated as described in *Materials and Methods*. Serial tissue sections were also stained with H&E or Congo red, and images were acquired as described in *Materials and Methods*. (Magnification: 80 $\times$ .) Although variable in concentration, the presence of amyloid-bound  $^{125}\text{I}$ -p5 was evidenced in the microautoradiographs as punctate black deposits that were intense in certain villi, and in each case, they colocalized with the red-gold amyloid deposits seen in Congo red-stained tissue section of the intestines.

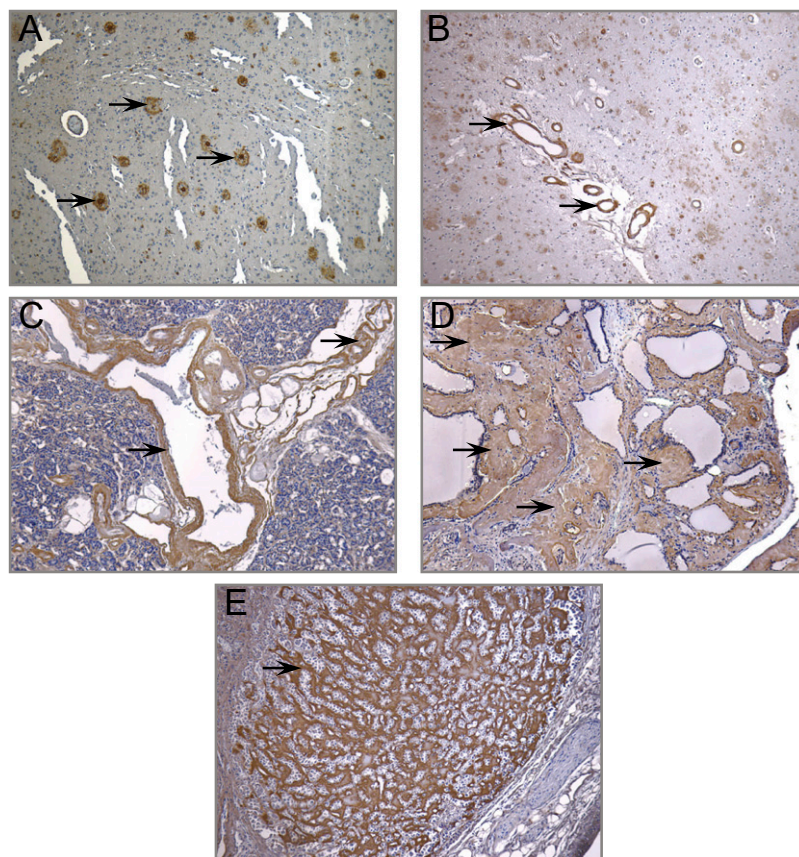

**Fig. S3.** Immunohistochemical staining of heparan sulfate. Human amyloid-containing tissues from patients with Alzheimer's disease (A and B), light chain amyloidosis (C and D), or AA (E) were stained using an antiheparan sulfate monoclonal antibody (F58-10E4 clone; Siekagaku Biobusiness Corp) followed by the addition of a biotinylated secondary reagent; finally, they were detected by the addition of streptavidin-conjugated HRP and visualized using diaminobenzidine (brown coloration). The specific binding of the antiheparan sulfate antibody (arrows) correlated with the distribution of amyloid deposits evidenced in Congo red-stained tissue sections. All slides were counterstained with H&E. (Magnification: 80 $\times$ .) For display, the images were scaled to 13% of original size.

**Table S1.** Percent ID per gram  $^{125}$ I-peptide in AA mice at 4 h pi ( $n = 3$ )

|                 | Peptide percent ID per gram (mean $\pm$ SD) |               |               |               |               |                |                |
|-----------------|---------------------------------------------|---------------|---------------|---------------|---------------|----------------|----------------|
|                 | p1                                          | p2            | p3            | p4            | p5            | p6             | p7             |
| Muscle          | 0.9 $\pm$ 0.3                               | 0.4 $\pm$ 0.3 | 0.5 $\pm$ 0.1 | 0.6 $\pm$ 0.1 | 0.7 $\pm$ 0.2 | 0.5 $\pm$ 0.0  | 0.7 $\pm$ 0.3  |
| Liver           | 7.6 $\pm$ 2.7                               | 1.0 $\pm$ 0.5 | 3.0 $\pm$ 0.8 | 3.2 $\pm$ 1.0 | 5.3 $\pm$ 1.0 | 2.6 $\pm$ 0.2  | 1.9 $\pm$ 0.4  |
| Pancreas        | 3.9 $\pm$ 1.3                               | 0.9 $\pm$ 0.7 | 1.2 $\pm$ 0.1 | 2.1 $\pm$ 0.9 | 9.5 $\pm$ 0.9 | 3.7 $\pm$ 1.2  | 1.8 $\pm$ 0.6  |
| Spleen          | 7.4 $\pm$ 2.8                               | 0.8 $\pm$ 0.4 | 1.0 $\pm$ 0.1 | 3.7 $\pm$ 1.1 | 8.3 $\pm$ 1.1 | 2.8 $\pm$ 0.3  | 1.2 $\pm$ 0.2  |
| L kidney        | 3.7 $\pm$ 0.9                               | 1.7 $\pm$ 1.2 | 1.6 $\pm$ 0.4 | 2.1 $\pm$ 0.6 | 2.7 $\pm$ 0.3 | 1.9 $\pm$ 0.0  | 1.8 $\pm$ 0.3  |
| Stomach         | 26.2 $\pm$ 3.9                              | 7.9 $\pm$ 3.3 | 9.8 $\pm$ 2.4 | 4.6 $\pm$ 1.1 | 8.4 $\pm$ 2.4 | 12.9 $\pm$ 2.9 | 13.0 $\pm$ 0.2 |
| Small intestine | 2.2 $\pm$ 0.6                               | 0.8 $\pm$ 0.4 | 1.0 $\pm$ 0.3 | 1.7 $\pm$ 0.5 | 4.0 $\pm$ 1.5 | 1.5 $\pm$ 0.6  | 1.5 $\pm$ 0.3  |
| Large intestine | 2.1 $\pm$ 0.5                               | 0.6 $\pm$ 0.5 | 1.4 $\pm$ 0.2 | 2.0 $\pm$ 0.6 | 1.9 $\pm$ 1.2 | 1.4 $\pm$ 0.2  | 1.3 $\pm$ 0.3  |
| Heart           | 2.0 $\pm$ 0.4                               | 0.6 $\pm$ 0.3 | 1.1 $\pm$ 0.2 | 1.6 $\pm$ 0.3 | 1.4 $\pm$ 0.2 | 1.0 $\pm$ 0.1  | 1.1 $\pm$ 0.2  |
| Lung            | 2.8 $\pm$ 0.5                               | 1.1 $\pm$ 0.5 | 1.3 $\pm$ 0.1 | 1.6 $\pm$ 0.2 | 1.1 $\pm$ 0.0 | 1.1 $\pm$ 0.1  | 1.5 $\pm$ 0.2  |
| Tongue          | nd                                          | nd            | 1.5 $\pm$ 0.1 | 2.3 $\pm$ 0.5 | nd            | nd             | nd             |

nd, not determined.

**Table S2.** Percent ID per gram <sup>125</sup>I-peptide in WT mice at 4 h pi (*n* = 3)

|                 | Peptide percent ID/g (mean ± SD) |           |           |           |           |           |           |
|-----------------|----------------------------------|-----------|-----------|-----------|-----------|-----------|-----------|
|                 | p1                               | p2        | p3        | p4        | p5        | p6        | p7        |
| Muscle          | 0.5 ± 0.3                        | 0.1 ± 0.0 | 0.1 ± 0.1 | 0.6 ± 0.2 | 0.2 ± 0.0 | 0.1 ± 0.1 | 0.3 ± 0.1 |
| Liver           | 1.3 ± 0.3                        | 0.3 ± 0.1 | 0.3 ± 0.1 | 2.6 ± 2.3 | 0.6 ± 0.0 | 0.5 ± 0.2 | 1.4 ± 0.2 |
| Pancreas        | 0.8 ± 0.5                        | 0.2 ± 0.1 | 0.2 ± 0.1 | 1.8 ± 1.0 | 0.6 ± 0.2 | 0.6 ± 0.4 | 0.9 ± 0.4 |
| Spleen          | 0.9 ± 0.4                        | 0.2 ± 0.1 | 0.2 ± 0.0 | 1.6 ± 0.8 | 0.4 ± 0.1 | 0.6 ± 0.2 | 1.4 ± 0.2 |
| L kidney        | 1.2 ± 0.6                        | 0.7 ± 0.2 | 0.6 ± 0.1 | 1.5 ± 0.5 | 1.3 ± 0.1 | 0.6 ± 0.2 | 1.6 ± 1.6 |
| Stomach         | 9.9 ± 5.3                        | 2.3 ± 0.6 | 1.4 ± 0.7 | 6.7 ± 3.3 | 3.6 ± 1.2 | 5.2 ± 2.8 | 6.3 ± 1.0 |
| Small intestine | 1.0 ± 0.4                        | 0.5 ± 0.4 | 0.3 ± 0.2 | 1.3 ± 0.6 | 0.7 ± 0.3 | 0.5 ± 0.2 | 0.7 ± 0.2 |
| Large intestine | 0.7 ± 0.3                        | 0.2 ± 0.0 | 0.2 ± 0.1 | 1.7 ± 1.0 | 0.4 ± 0.1 | 0.5 ± 0.2 | 0.7 ± 0.3 |
| Heart           | 0.8 ± 0.4                        | 0.2 ± 0.1 | 0.2 ± 0.1 | 1.4 ± 0.6 | 0.5 ± 0.2 | 0.4 ± 0.1 | 0.5 ± 0.1 |
| Lung            | 1.7 ± 0.7                        | 0.4 ± 0.1 | 0.9 ± 1.0 | 1.9 ± 0.7 | 1.0 ± 0.2 | 0.7 ± 0.1 | 0.8 ± 0.1 |
| Tongue          | nd                               | nd        | 0.3 ± 0.0 | 2.9 ± 1.2 | nd        | Nd        | nd        |

nd, not determined.
